# Supplementary material for: AhR and SHP regulate phosphatidylcholine and S-adenosylmethionine levels in the one-carbon cycle
Source: Nat Commun. 2018 Feb 7;9:540. doi: 10.1038/s41467-018-03060-y (PMC5803255; doi:10.1038/s41467-018-03060-y)
Supplement: Supplementary file 1 — Supplementary Information [file 41467_2018_3060_MOESM1_ESM.pdf]

# Supplementary Information

## Supplementary Figures

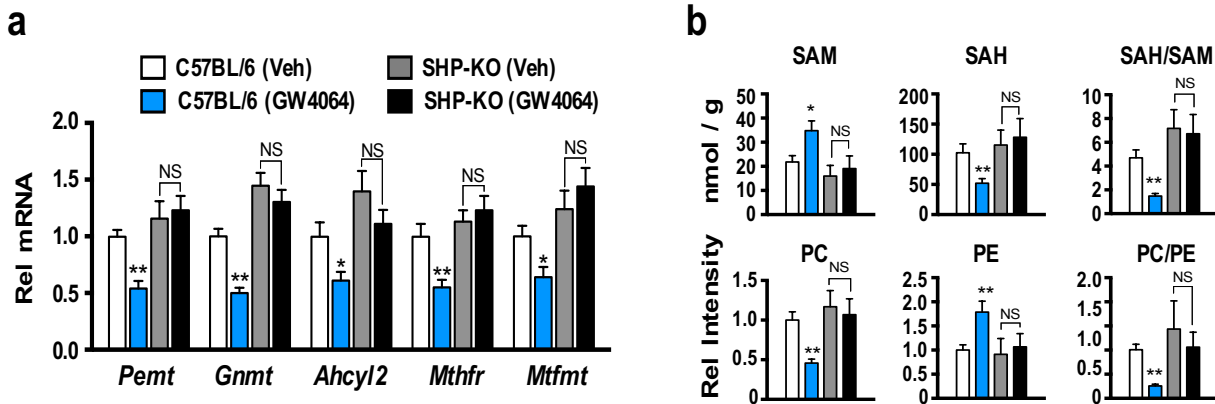

**Supplementary Figure 1.** (a-b) C57BL/6 mice and SHP-KO mice were fasted for 12 h and then, treated with GW4064 for 6 h. Livers were collected and mRNA levels of 1C cycle genes (a) or 1C cycle metabolites levels (b) were determined by q-RTPCR or LC-MS, respectively. Means  $\pm$  SD are shown ( $n=5$  mice), and statistical significance was measured by two-way ANOVA with the FDR post-test and \* $P<0.05$ , \*\* $P<0.01$ , and NS, not statistically significant.

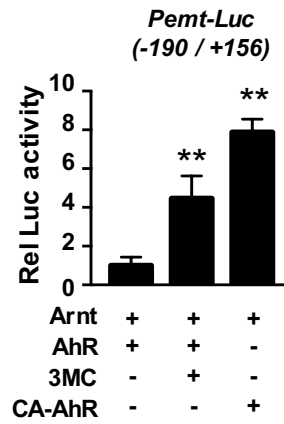

**Supplementary Figure 2.** Hepa1c1c7 cells were transfected with a *Pemt-luc* construct containing the WT AhR binding site in the *Pemt* promoter along with expression plasmids as indicated, treated with FGF19 for 2 h and luciferase activity was measured and normalized to  $\beta$ -galactosidase activity. Means  $\pm$  SD are shown (n=5), and statistical significance was measured using one-way ANOVA with the FDR post-test. \*P<0.05, \*\*P<0.01, and NS, not statistically significant.

**a Subcellular localization (HepG2)**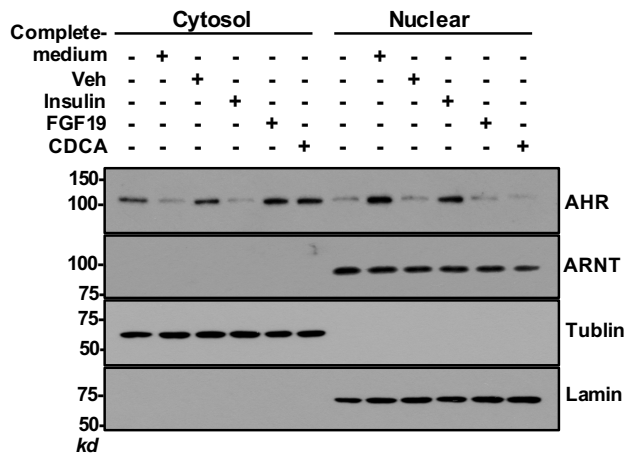**b Subcellular localization (HepG2)**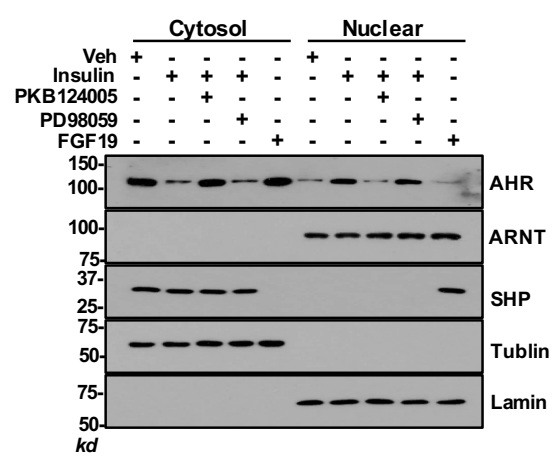

**Supplementary Figure 3.** (a) HepG2 cells were grown in low-glucose, serum-free media for 12 h and transferred for 15 min to complete medium or treated with insulin, FGF19, or CDCA for 15 min, then cells were harvested. (b) Cells were pre-treated with a PKB inhibitor, PKB124005, or an ERK inhibitor, PD98059, for 30 min prior to insulin treatment as indicated. Levels of AhR and SHP in the cytoplasmic and nuclear fractions were determined by IB. Full size immunoblots are in Supplementary Figure 13a.

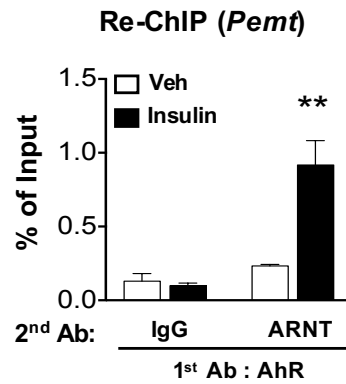

**Supplementary Figure 4.** Chromatin isolated from Hepa1c1c7 cells treated with insulin for 1 h was immunoprecipitated with AhR antibody, then eluted, and re-precipitated with ARNT antibody to examine the occupancy of ARNT in AhR-bound chromatin at the *Pemt* promoter. Means  $\pm$  SD are shown (n=5), and statistical significance was measured using two-way ANOVA with the FDR post-test. \*P<0.05, \*\*P<0.01, and NS, statistically not significant.

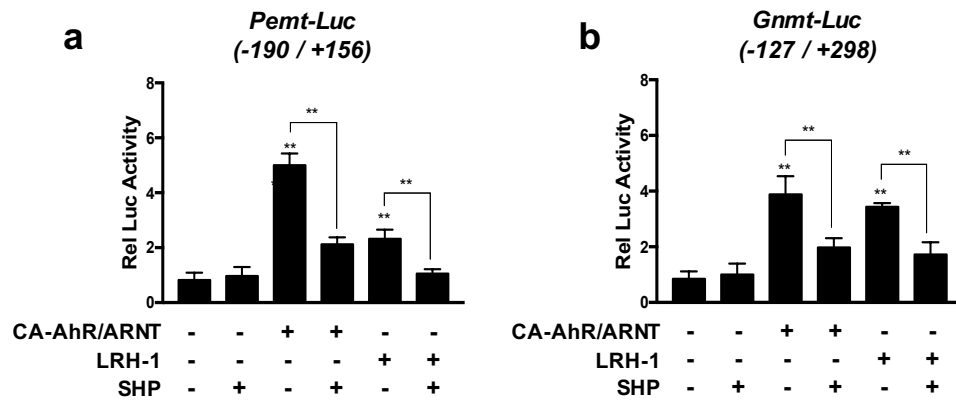

**Supplementary Figure 5.** Hepa1c1c7 cells were transfected with a *Pemt-luc* or *Gnmt-luc* promoter construct containing AhR binding sites along with expression plasmids as indicated. After 2 days, luciferase activities were measured. Means  $\pm$  SD are shown ( $n=5$ ), and statistical significance was measured using one-way ANOVA with the FDR post-test. \* $P<0.05$ , \*\* $P<0.01$ , and NS, statistically not significant.

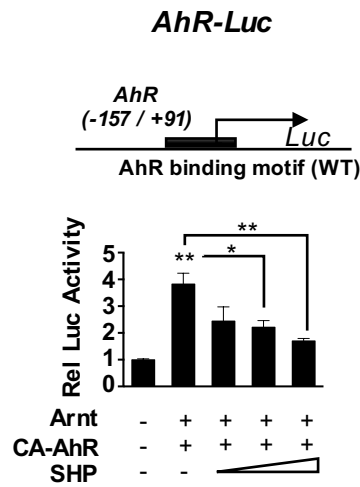

**Supplementary Figure 6.** Hepa1c1c7 cells were transfected with a *AhR-luc* construct containing the WT AhR binding site in the *AhR* promoter along with expression plasmids as indicated. After 2 days, cells were treated with FGF19 for 1 h, and luciferase activities were measured and normalized to  $\beta$ -galactosidase activity. Means  $\pm$  SD are shown (n=5), and statistical significance was measured using one-way ANOVA with the FDR post-test. \*P<0.05, \*\*P<0.01, and NS, statistically not significant.

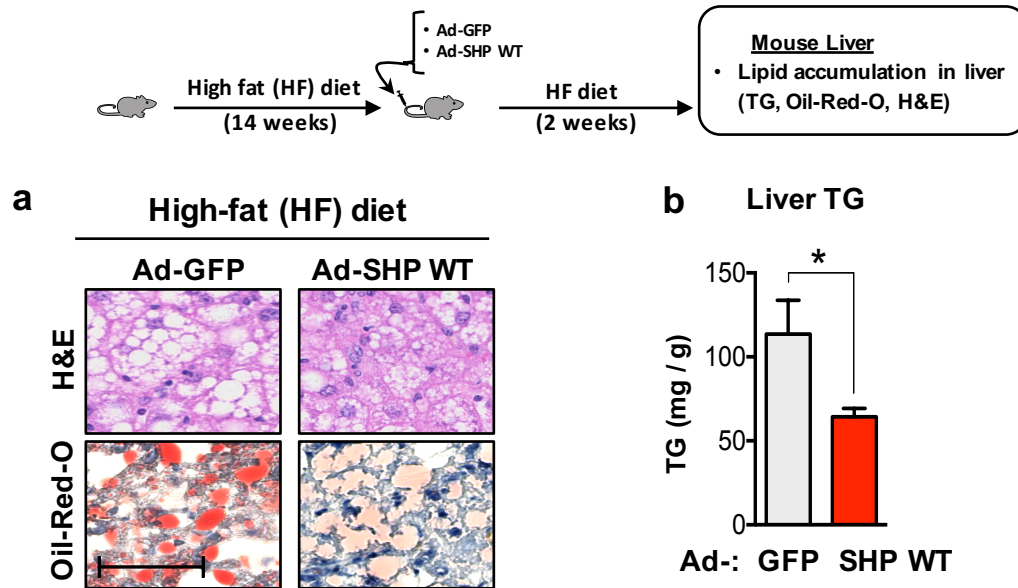

**Supplementary Figure 7.** Mice (n=5/group) were fed a high-fat diet for 14 weeks and Ad-GFP control or Ad-SHP were injected via the tail vein. Two weeks later (total = 16 weeks), livers were isolated. (a) Effects of SHP overexpression on lipid regulation in liver were determined by liver histology detected by Oil-Red-O staining and hematoxylin and eosin (H&E) staining. Scale bar: 100  $\mu$ M (b) Triglyceride (TG) levels in liver were measured. Means  $\pm$  SD are shown (n=5 mice), and statistical significance was measured using by the Student's t-test. \*P<0.05, \*\*P<0.01, and NS, statistically not significant.

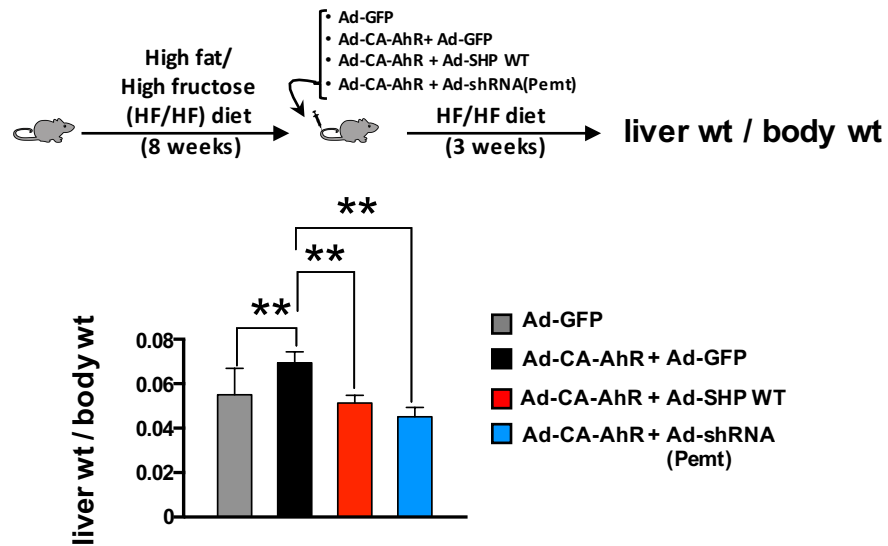

**Supplementary Figure 8. Effects of expression of SHP or downregulation of *Pemt* on the CA-AhR-mediated increase in liver weight/body weight.** Mice (n=5/group) were fed a HF/HF diet for 8 weeks, infected with the indicated adenovirus, and after 3 weeks, body and liver weights were measured. The ratio of liver weight/ body weight is plotted. Means +/- SD are shown (n=5 mice), and statistical significance was measured using one-way ANOVA with the FDR post-test. \*P<0.05, \*\*P<0.01, and NS, statistically not significant.

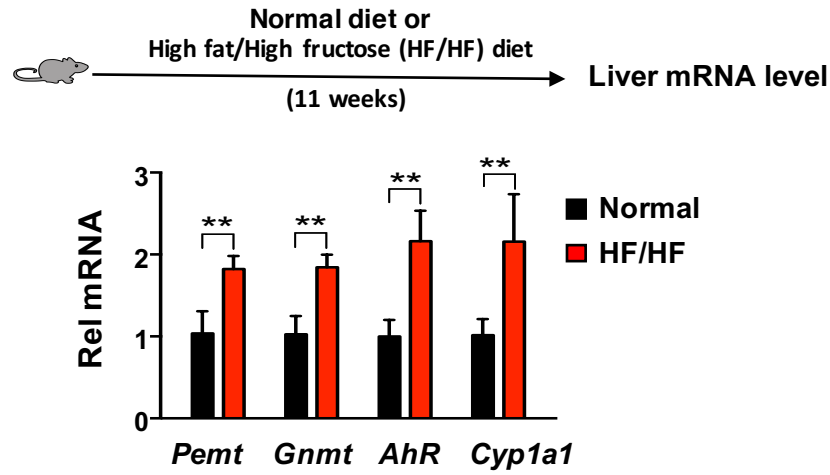

**Supplementary Figure 9. Effects of a chronic HF/HF diet on hepatic expression of *Pemt*, *Gnmt*, *AhR*, and *Cyp1a1*.** Mice (n=5/group) were fed either a normal chow diet (ND) or a high fat/high fructose (HF/HF) diet for 11 weeks, and then, mice were sacrificed and livers were collected. The mRNA levels of *Pemt*, *Gnmt*, *AhR*, and *Cyp1a1* were determined by q-RTPCR. Means  $\pm$  SD are shown (n=5 mice), and statistical significance was measured using the Student's t-test, \*P<0.05, \*\*P<0.01, and NS, statistically not significant.

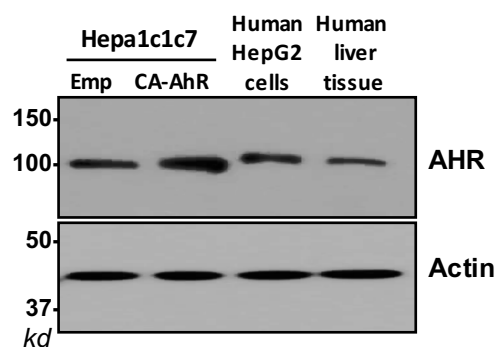

**Supplementary Figure 10.** Hepa1c1c7 cells were transfected with empty vector or pCMX-CA-AhR expressing human CA-AhR. Human HepG2 cells were also grown in normal media. After 2 days, protein was isolated from the cells as well as from human liver tissue and AhR or actin was detected by immunoblotting. As expected human CA-AhR and mouse WT AhR have similar mobilities. Full size immunoblots are in Supplementary Figure 13b.

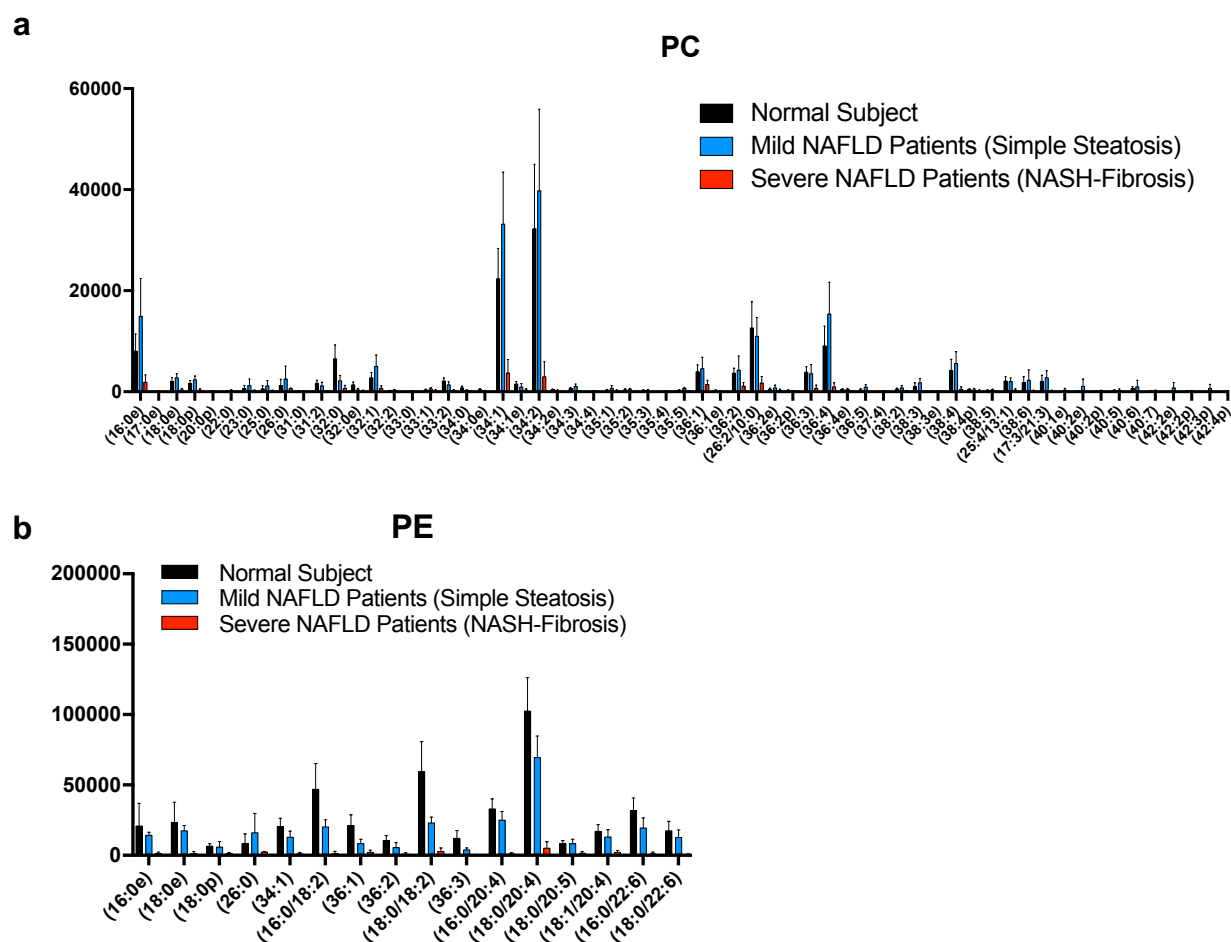

**Supplementary Figure 11.** Levels of individual PC or PE molecules in liver samples of 15 normal, 15 simple steatosis, and 15 severe NASH-fibrosis patients were determined by LC-MS. Means  $\pm$  SD are shown (n=15 human).

Supplementary Figure 12. Full size immunoblots of cropped blots in the main manuscript figures.

a Full size immunoblots of cropped blots for Fig. 4a and 4b

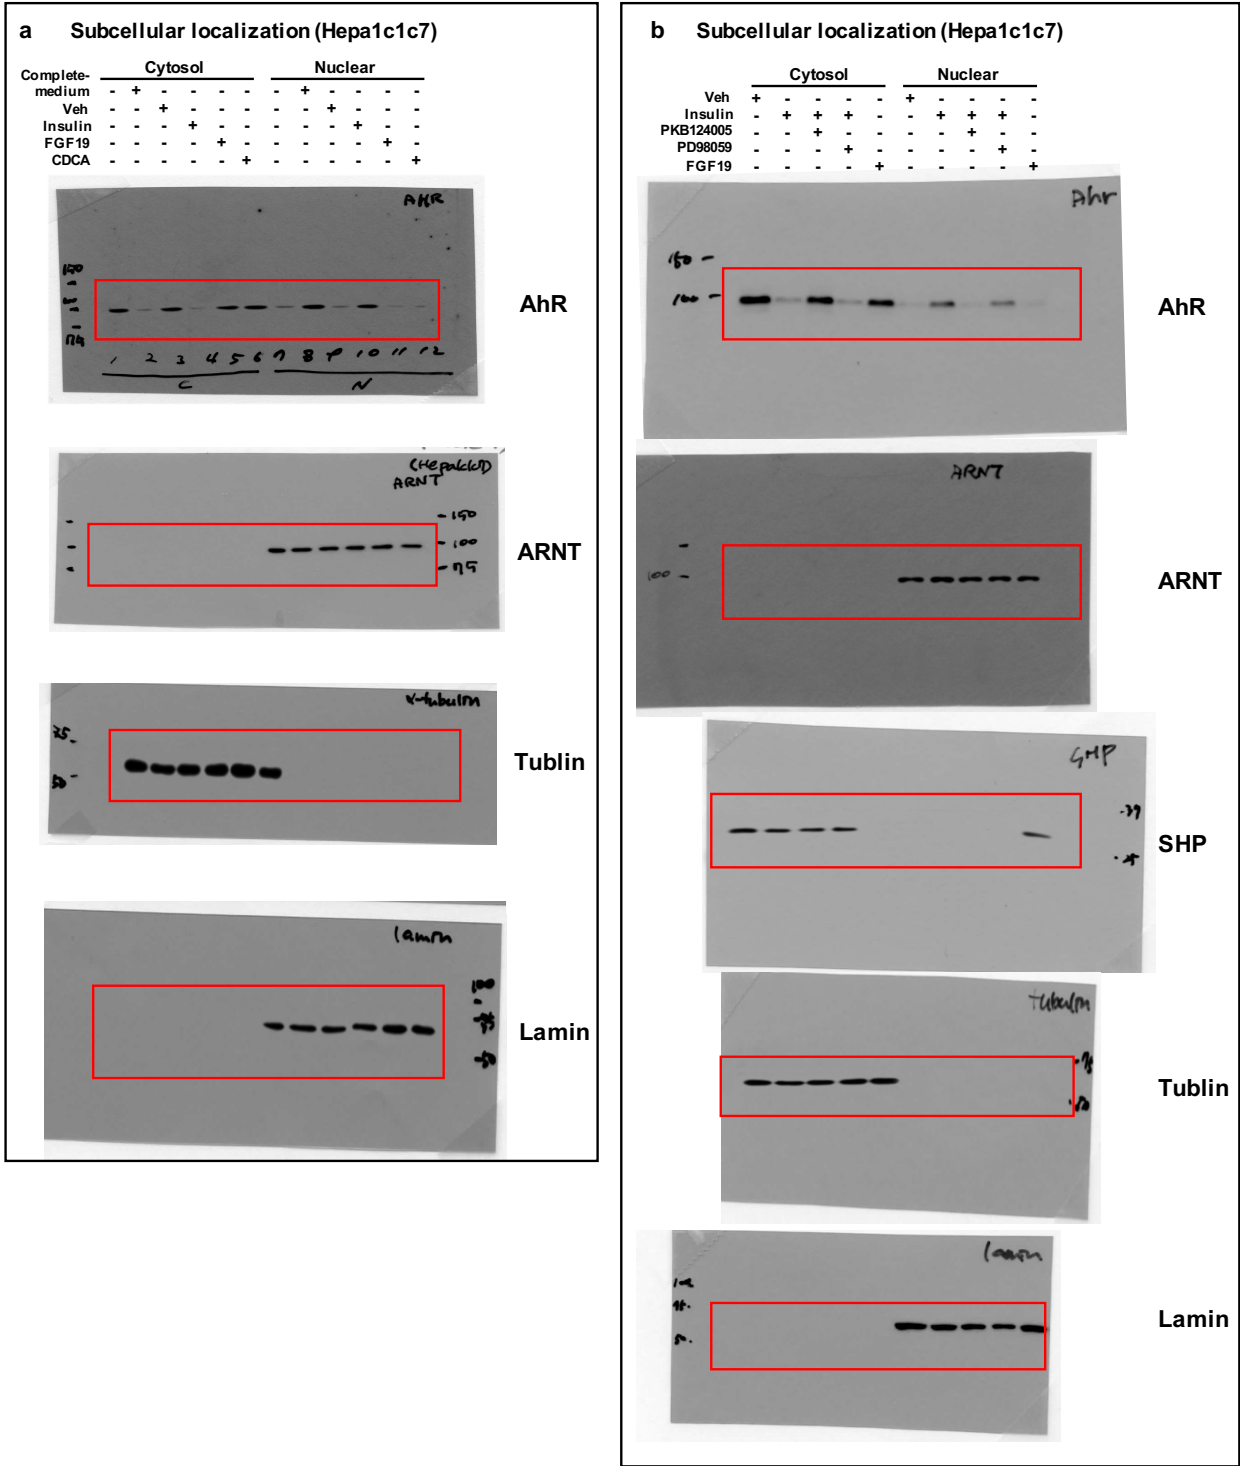

Supplementary Figure 12. Full size immunoblots of cropped blots in the main manuscript figures.

b Full size immunoblots of cropped blots for Fig. 5f

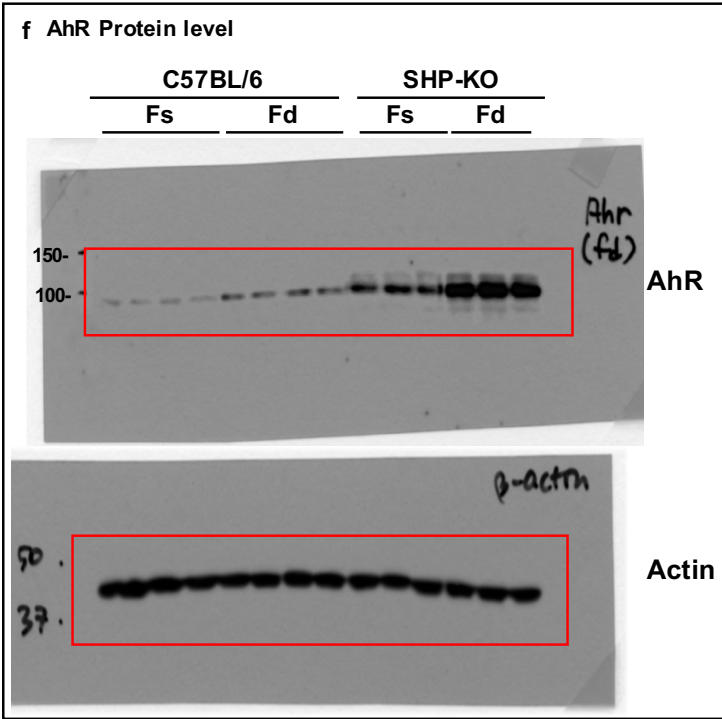

c Full size immunoblots of cropped blots for Fig. 6c

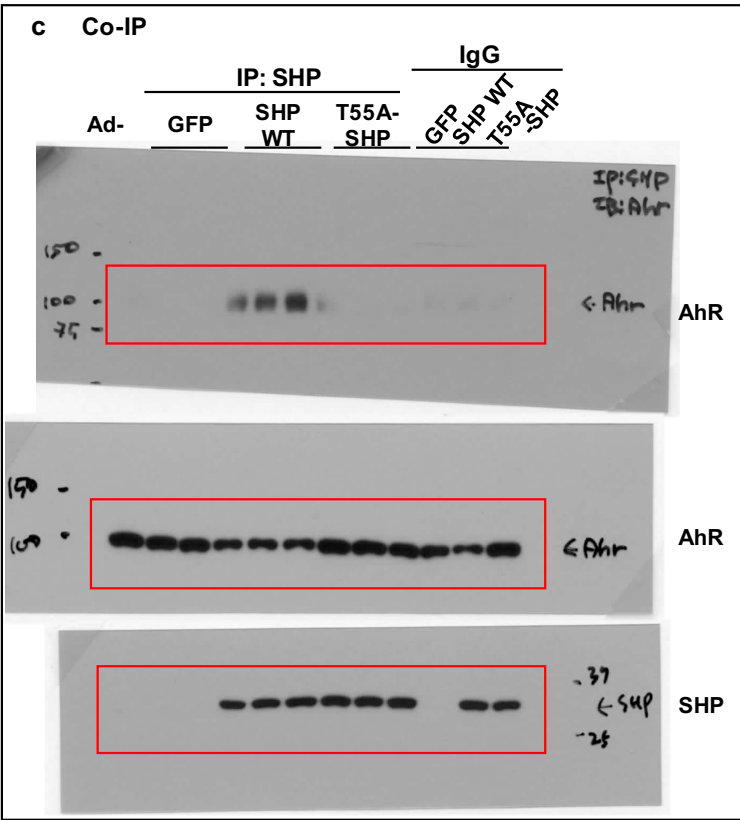

Supplementary Figure 12. Full size immunoblots of cropped blots in the main manuscript figures.

d Full size immunoblots of cropped blots for Fig. 7b

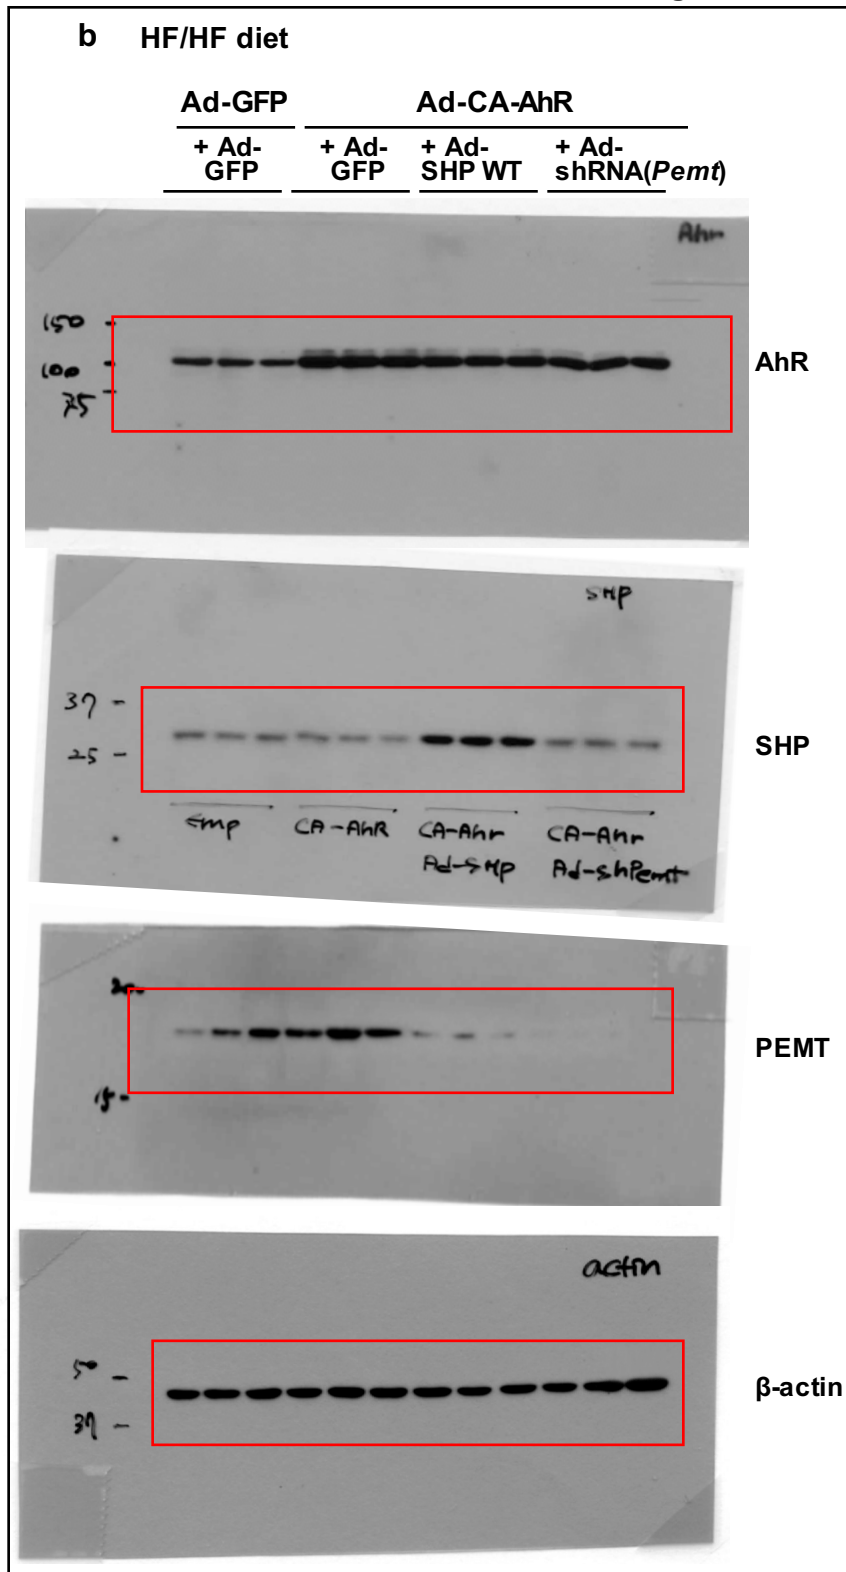

Supplementary Figure 12. Full size immunoblots of cropped blots in the main manuscript figures.

e Full size immunoblots of cropped blots for Fig. 8b

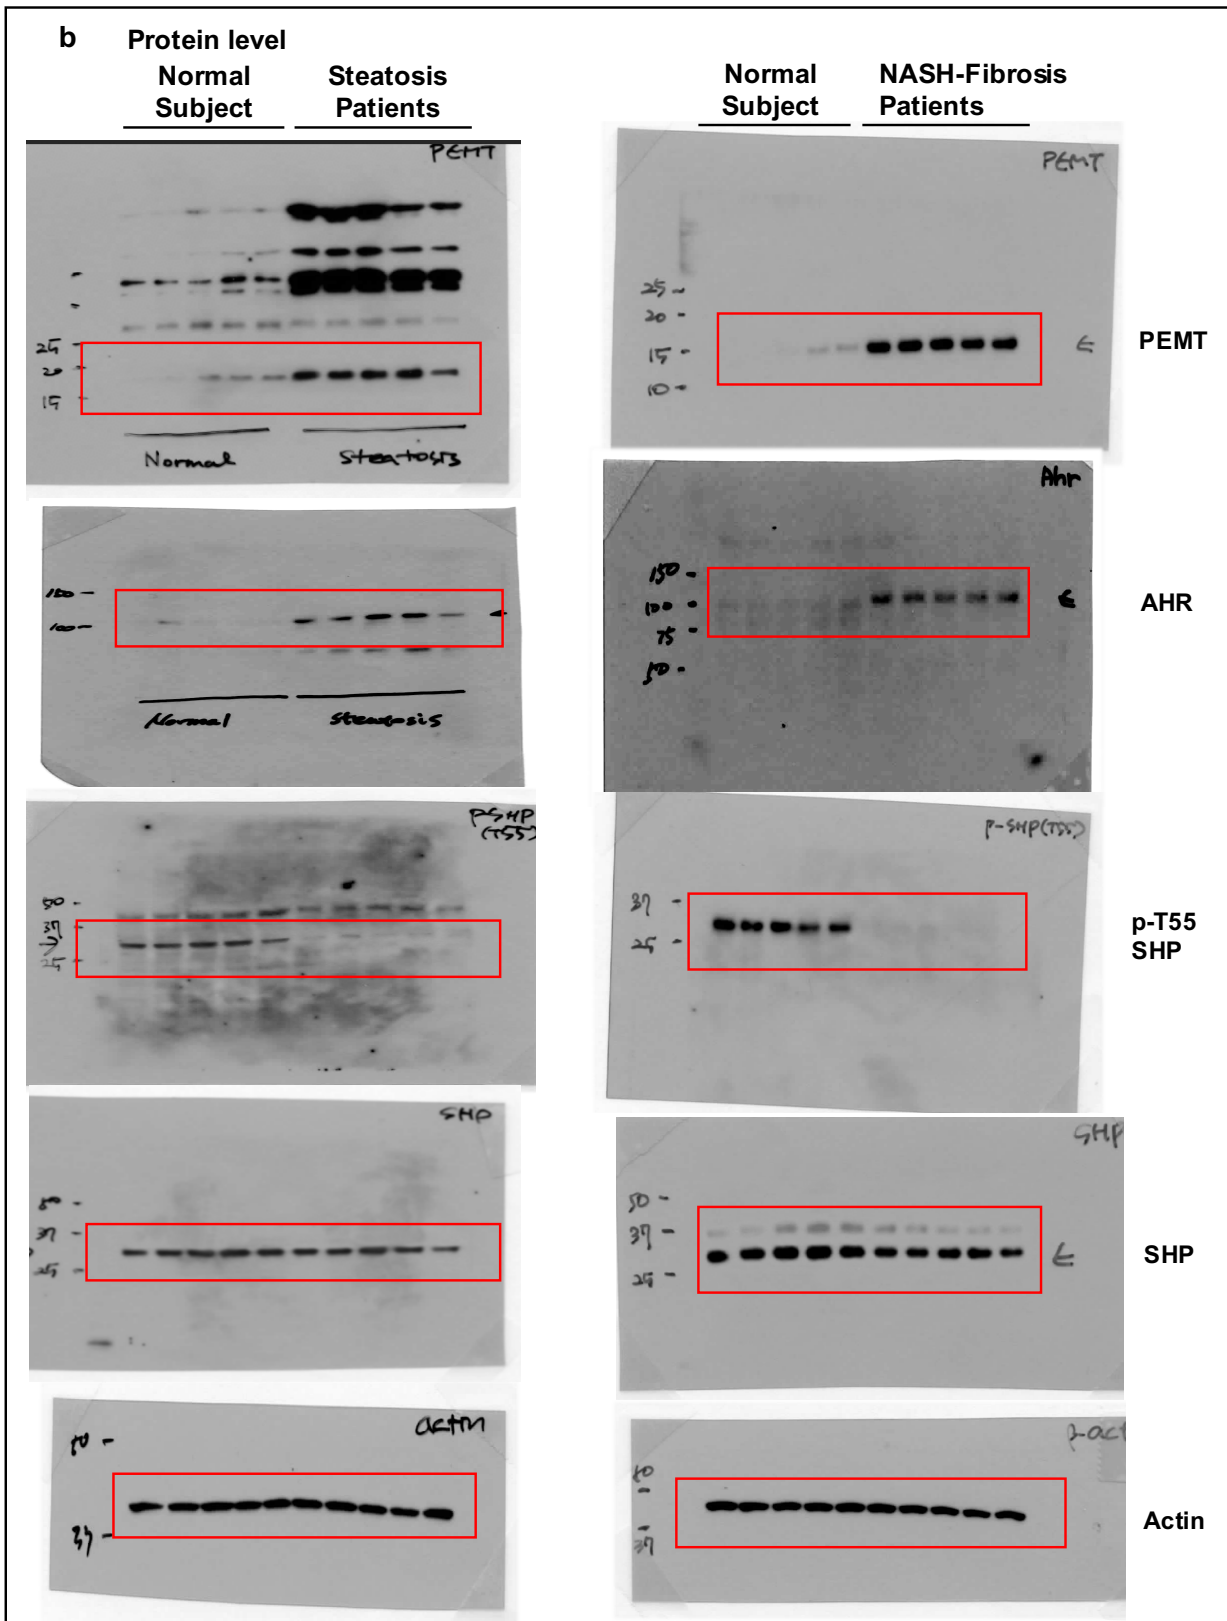

**Supplementary Figure 13. Full size immunoblots of cropped blots in the Supplementary figures.**

**a Full size immunoblots of cropped blots for Supplementary Figure 3a and 3b**

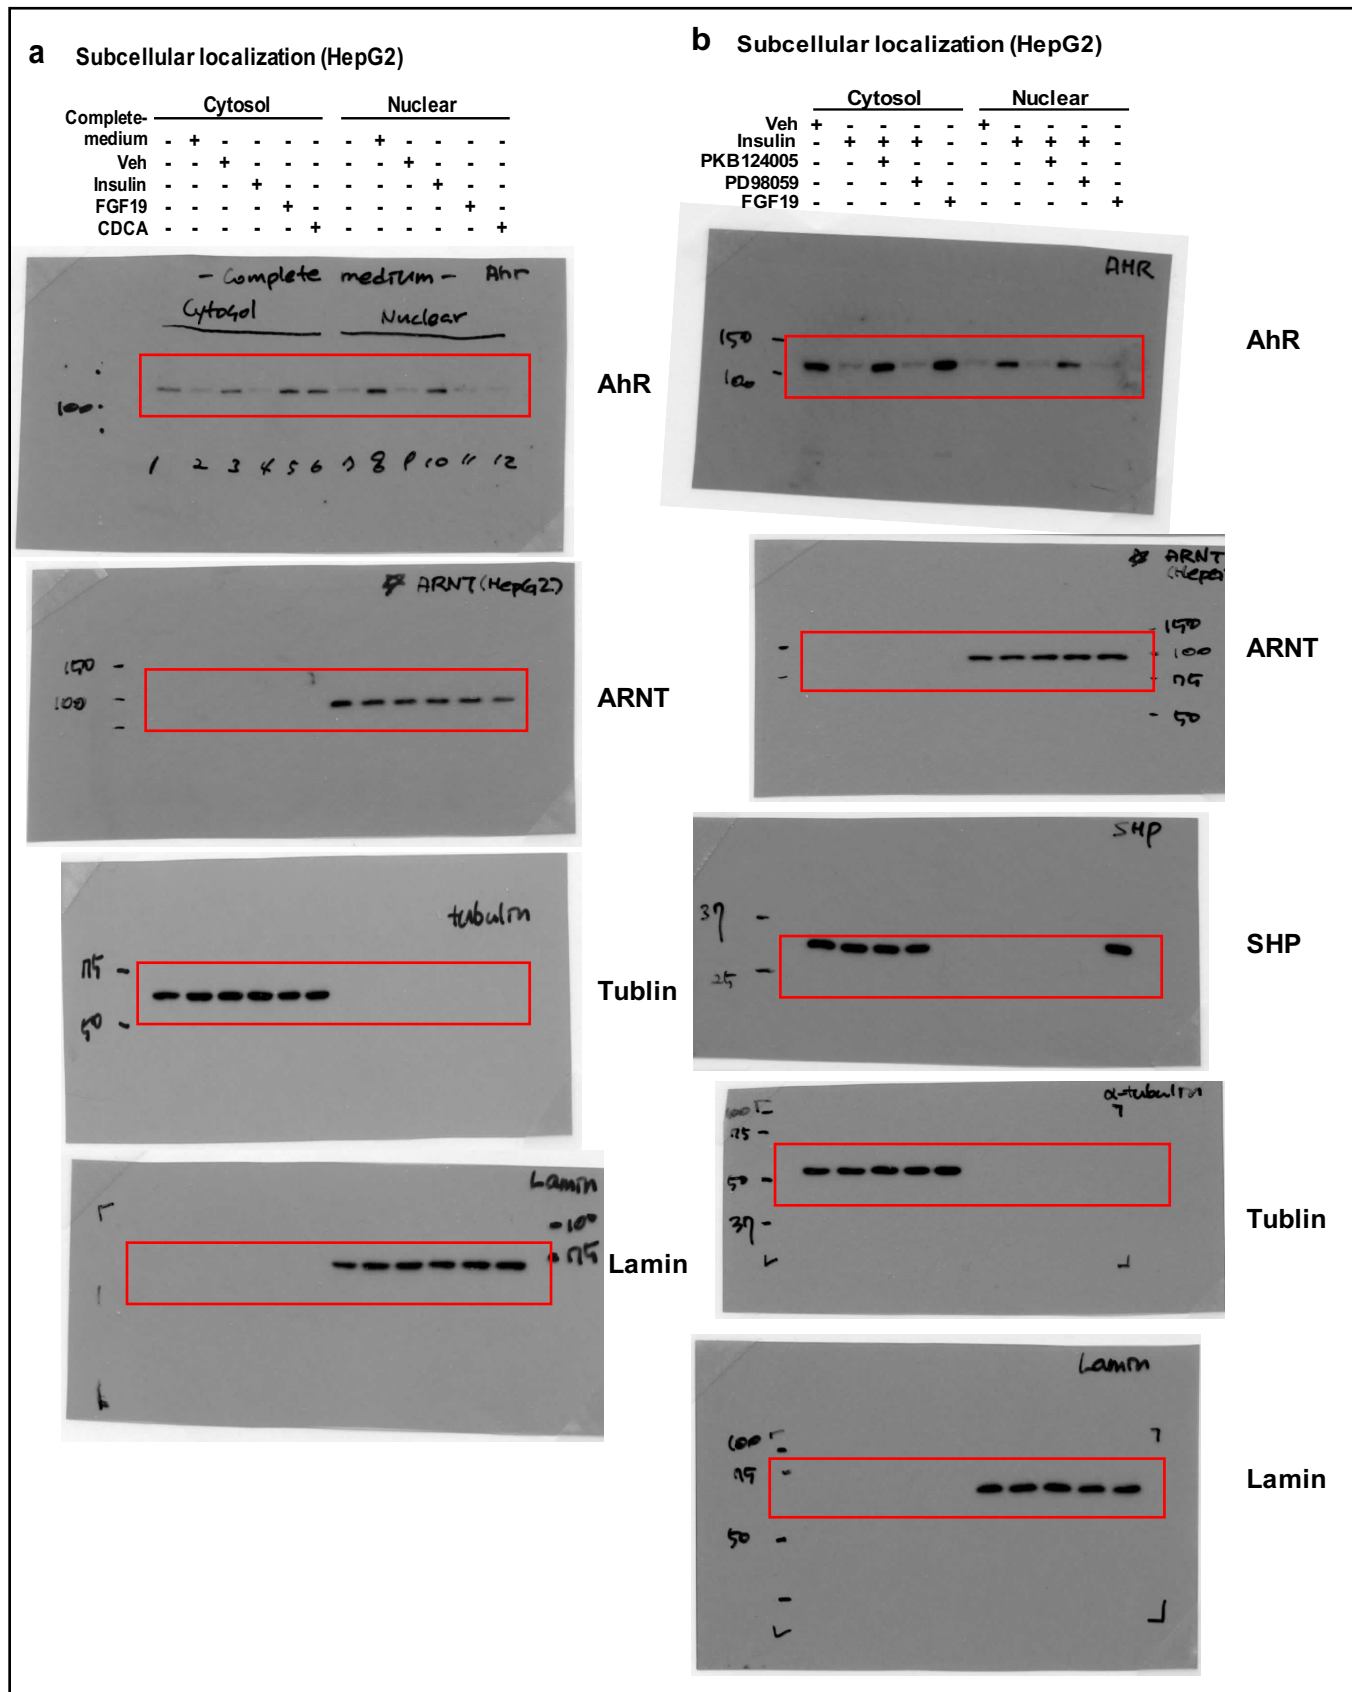

**Supplementary Figure 13. Full size immunoblots of cropped blots in the Supplementary figures.****b Full size immunoblots of cropped blots for Supplementary Figure 10**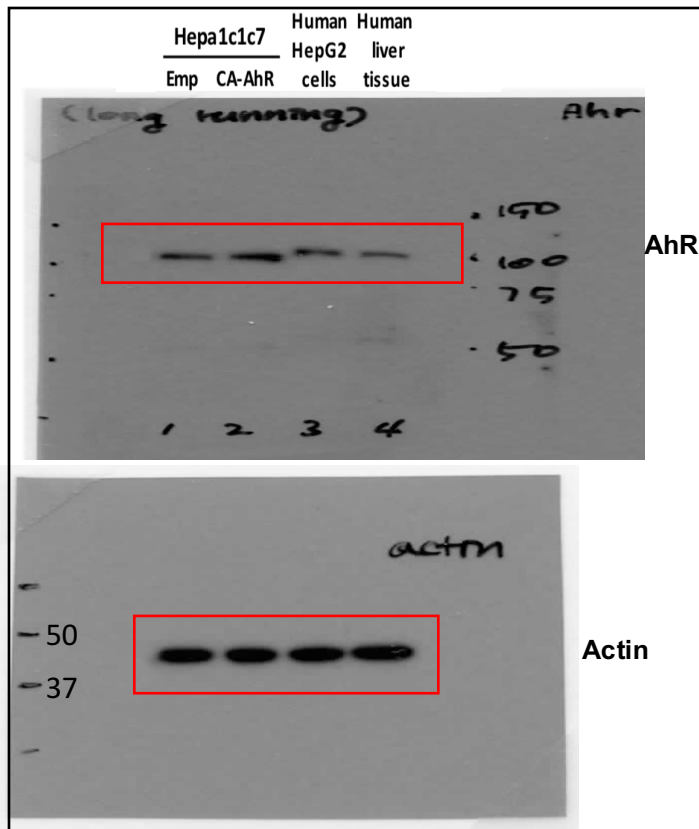

## Supplementary Tables

**Supplementary Table 1.** Sequences of the primers used in ChIP assays

| Species | Type | Gene    | Sequence                 |
|---------|------|---------|--------------------------|
| mouse   | ChIP | AhR     | AGTCCGTCCACCAAGTTCG      |
| mouse   | ChIP | AhR     | TCTTGATGTCTGGGTTACAAGG   |
| mouse   | ChIP | Ahcyl2  | GGAGGAGGGACGAAAGGAC      |
| mouse   | ChIP | Ahcyl2  | CAGAACCTGTAGTGCGCTTG     |
| mouse   | ChIP | Mthfr   | CGCCATCTTCCTCCTTTG       |
| mouse   | ChIP | Mthfr   | CACATCTACGAGACGAGACGAC   |
| mouse   | ChIP | Ahcyl2  | GGAGGAGGGACGAAAGGAC      |
| mouse   | ChIP | Ahcyl2  | CAGAACCTGTAGTGCGCTTG     |
| mouse   | ChIP | Atic    | CTGTCCGTCCCTTGACTCC      |
| mouse   | ChIP | Atic    | TTCTCATTACTCGCGGCTTC     |
| mouse   | ChIP | Mtfmt   | GTGGCTGATGGGAAGGAG       |
| mouse   | ChIP | Mtfmt   | GGAGATGGAGGGTCTGCTG      |
| mouse   | ChIP | Cyp1a1  | CGGTTGTGAGTTGGGTAGC      |
| mouse   | ChIP | Cyp1a1  | TAAGCCTGCTCCATCCTCTG     |
| mouse   | ChIP | Gnmt    | TCTCCCATGCCCATACTACC     |
| mouse   | ChIP | Gnmt    | CCGTACCGCAGAGTACAAGG     |
| mouse   | ChIP | Pemt    | GGAGCTGTACCTGCCTGAAG     |
| mouse   | ChIP | Pemt    | ATGCCCTAGTCCCTCTCTCC     |
| mouse   | ChIP | Aldh1a1 | TTTCTTCTCCAGTTGATTTCT    |
| mouse   | ChIP | Aldh1a1 | CGCTTATATCTATCCTTCTATTCT |
| mouse   | ChIP | Dhfr    | GCAAGTGGTACACAGCTCAGG    |
| mouse   | ChIP | Dhfr    | CCAGGGTAGGTCTCCGTTT      |

**Supplementary Table 2.** Sequences of the primers used in q-RTPCR assays

| Species | Type     | Gene           | Sequence                 |
|---------|----------|----------------|--------------------------|
| Mouse   | mRNA     | 36B4 (control) | TGCTGAACATGCTCAAC        |
| Mouse   | mRNA     | 36B4 (control) | GTCGAACACCTGCTGGATGAC    |
| Mouse   | mRNA     | AhR            | TCCACAACCTGGCTTTGTTTG    |
| Mouse   | mRNA     | AhR            | CCAGAATAAGCTGCCCTTTG     |
| Mouse   | mRNA     | Mtfmt          | CAGACTCTCAGACTTCCA       |
| Mouse   | mRNA     | Mtfmt          | TGTCATCTTCTTGCTTGTA      |
| Mouse   | mRNA     | Aldh1a1        | TTTCTTCTCCAGTTGATTTCT    |
| Mouse   | mRNA     | Aldh1a1        | CGCTTATATCTATCCTTCTATTCT |
| Mouse   | mRNA     | Gnmt           | GCTTTCAGGAGATGGCTTTG     |
| Mouse   | mRNA     | Gnmt           | GTGGGCTTTGTTGTTGACTG     |
| Mouse   | mRNA     | Pemt           | AGCAGAGAACTCGGAAGCTG     |
| Mouse   | mRNA     | Pemt           | CCAGGAAGTAGGTGGTGTGG     |
| Mouse   | mRNA     | Ahcyl2         | GTCCACGGTCTTCTAGTCG      |
| Mouse   | mRNA     | Ahcyl2         | CTGACTCTCGCACCAGCTC      |
| Mouse   | mRNA     | Atic           | CTGTCCGTCCCTTGACTCC      |
| Mouse   | mRNA     | Atic           | TTCTCATTACTCGCGGCTTC     |
| Mouse   | mRNA     | Mthfr          | GTGGTCCTCTGTGCCTCTTC     |
| Mouse   | mRNA     | Mthfr          | AGCCAGCCTCTGCTTAGATG     |
| Mouse   | mRNA     | Cyp1a1         | CAGCATCCTCTTGCTACTTGG    |
| Mouse   | mRNA     | Cyp1a1         | TGAGGCTGTCTGTGATGTCC     |
| Mouse   | mRNA     | Dhfr           | GCTGGGTGCAGTCTTAGGAG     |
| Mouse   | mRNA     | Dhfr           | AGGGAGCACTGAAGAAGTGG     |
| Mouse   | pre-mRNA | Pemt           | AAATACGAGCCCGACAACCTG    |
| Mouse   | pre-mRNA | Pemt           | ACCACTACCACCACCAATCG     |
| Mouse   | pre-mRNA | AhR            | TTTCGTCGGTAGAGCAGTCC     |
| Mouse   | pre-mRNA | AhR            | CTGTGTCGCTTAGAAGGATTTG   |
| Mouse   | pre-mRNA | Cyp1a1         | TTCTGTCTCCTCCGTTACCTG    |
| Mouse   | pre-mRNA | Cyp1a1         | CCTAACTGCTTCCCATCACC     |
| Human   | mRNA     | hPEMT          | GCTCTCCAGCTTCTTTGCAC     |
| Human   | mRNA     | hPEMT          | AGGTAGTTGGCTGTGCTTCC     |
| Human   | mRNA     | hGNMT          | AGCCAACTGGATGACTCTGG     |
| Human   | mRNA     | hGNMT          | GTCTGGCAAGTGAGCGAAAC     |
| Human   | mRNA     | hAHR           | ACTCCACTTCAGCCACCATC     |
| Human   | mRNA     | hAHR           | CTTCCTTTGGCATCACAACC     |
| Human   | mRNA     | hSHP           | CAGAGATCAGGTGGGCAGAG     |
| Human   | mRNA     | hSHP           | TGTGGCTGAGTGAAGAGCTG     |
